# Supplementary material for: Quality of life in adults with multiple sclerosis: a systematic review
Source: PubMed Central journal article supplement — BMJ Open. 2020 Nov 30;10(11):e041249. doi: 10.1136/bmjopen-2020-041249 (PMC7705559; doi:10.1136/bmjopen-2020-041249), 2020-11-30
Supplement: bmjopen-2020-041249supp001.pdf [file bmjopen-2020-041249supp001.pdf]

## Supplement Digital Content A: Search strategy for data bases

### SCOPUS

TITLE-ABS-KEY ( "MULTIPLE SCLEROSIS" ) AND TITLE-ABS-KEY ( "QUALITY OF LIFE" OR "Health-related quality of life" OR "Well-being" OR "Wellbeing" OR "Life satisfaction" ) AND ( LIMIT-TO ( PUBYEAR , 2019 ) OR LIMIT-TO ( PUBYEAR , 2018 ) OR LIMIT-TO ( PUBYEAR , 2017 ) OR LIMIT-TO ( PUBYEAR , 2016 ) OR LIMIT-TO ( PUBYEAR , 2015 ) OR LIMIT-TO ( PUBYEAR , 2014 ) ) AND ( LIMIT-TO ( DOCTYPE , "ar" ) ) AND ( LIMIT-TO ( LANGUAGE , "English" ) )

### WEB OF SCIENCE

(TS= ("MULTIPLE SCLEROSIS") AND TS= ("QUALITY OF LIFE" OR "Health-related quality of life" OR "Well-being" OR "Wellbeing" OR "Life satisfaction")) AND SEARCH LANGUAGE: (English) AND DOCUMENT TYPE: (Article)

Timespan: 2014-2019.

### PROQUEST

ab("MULTIPLE SCLEROSIS") AND "QUALITY OF LIFE" OR "HEALTH-RELATED QUALITY OF LIFE" OR "WELL-BEING" OR "WELLBEING" OR "LIFE SATISFACTION"

Date: From 2014 January 01 to 2019 January 31

Source type: Scholarly journal

Document type: Article

Language: English

Age group: Adult (19-44 years), Middle aged (45-64 years), Aged (65+ years), Aged (80+ years)
